# Supplementary material for: Wearable tactile sensor based on flexible microfluidics
Source: Royal Society of Chemistry journal article supplement (doi:10.1039/c6lc00579a), 2016-01-01
Supplement: c6lc00579a1.pdf [file c6lc00579a1.pdf]

# Supporting Information

## Wearable microfluidic pressure sensors based on deformation mechanics

Joo Chuan Yeo<sup>1,2,3</sup>, Jiahao Yu<sup>1</sup>, Zhao Ming Koh<sup>1</sup>, Zhiping Wang<sup>2</sup>, Chwee Teck Lim<sup>1,3,\*</sup>

<sup>1</sup>Department of Biomedical Engineering, National University of Singapore, Singapore 117575

<sup>2</sup>Singapore Institute of Manufacturing Technology (SIMTech), A\*STAR, Singapore 138634

<sup>3</sup>Mechanobiology Institute, National University of Singapore, Singapore 117411

\*Correspondence: Chwee Teck Lim ([ctlim@nus.edu.sg](mailto:ctlim@nus.edu.sg))

### Calculation of deformation mechanics

The deformation behavior is expressed in relation to the electrical resistance. First, the pressure sensing region is expressed by Eq. S1,

$$R_{circle} = \int_{-r}^r \frac{\rho}{2h\sqrt{r^2 - x^2}} dx = \frac{\pi\rho}{2h} \quad (S1)$$

where  $R_{circle}$  is the resistance of the pressure sensing region,  $\rho$  is the electrical conductivity of eutectic Gallium Indium,  $h$  is microchannel height, and  $r$  is the radius of the pressure sensing region.

Similarly, the equivalent resistance of the parallel interconnects,  $R_{arc}$ , is expressed in Eq. S2,

$$R_{arc} = \rho \cdot \frac{\frac{1}{4}\pi d}{wh} \cdot \frac{1}{2} = \frac{\pi d\rho}{8wh} \quad (S2)$$

where  $d$  is the arc diameter and  $w$  is the microchannel width. Therefore, the initial resistance of the sensor is expressed by the sum of resistances in Eq. S3,

$$R_0 = \frac{\pi\rho}{2h} + \frac{\pi d\rho}{4wh} \quad (S3)$$

Under pressure  $P$ , the sensor assumes a uniform deformation to the pressure sensing region. As such, the resistance of the region is expressed as Eq. S4,

$$R'_{circle} = \frac{\rho}{2(h - \Delta h)} \int_{-r}^r \frac{1}{\sqrt{r^2 - x^2}} dx = \frac{\rho\pi}{2(h - \Delta h)} \quad (S4)$$

where  $\Delta h$  is the deformed height. The compression load could be assumed in the linear elastic region, and is expressed as Eq. S5.

$$\Delta h = \frac{Ph}{E_c} \quad (S5)$$

where  $E_c$  is the compression modulus of silicone rubber (i.e., 209 kPa). Substituting S5 into the Eq. S3 and S4, the normalized resistance is expressed in Eq. S6.

$$\frac{\Delta R}{R_0} = \frac{R'_{circle} - R_{circle}}{R_{circle} + 2 \cdot R_{arc}} = \frac{\frac{\pi\rho}{2(h - \Delta h)} - \frac{\pi\rho}{2h}}{\frac{\pi\rho}{2h} + \frac{\pi d\rho}{4wh}} = \frac{2Pw}{(2w + d)(E_c - P)} \quad (S6)$$
